# Supplementary material for: Self-assembled hierarchical Bi12TiO20–graphene nanoarchitectures with excellent simulated sunlight photocatalytic activity
Source: Royal Society of Chemistry journal article supplement (doi:10.1039/c3cp53070a), 2013-10-17

## Electronic Supplementary Information

### Self-assembled hierarchical Bi<sub>12</sub>TiO<sub>20</sub>/graphene nanoarchitectures with excellent simulated sunlight photocatalytic activity

Wan Guo,<sup>a</sup> Yuxin Yang,<sup>b</sup> Yingna Guo,<sup>a</sup> Yanqin Jia,<sup>a</sup> Hongbo Liu<sup>c</sup> and Yihang Guo\*<sup>a</sup>

<sup>a</sup> Faculty of Chemistry, Northeast Normal University, Changchun 130024, P.R. China

<sup>b</sup> School of Environment, Northeast Normal University, Changchun 130024, P.R. China

<sup>c</sup> Changchun Institute of Optics, Fine Mechanics and Physics, Chinese Academy of Sciences, Changchun 130033, P.R. China

---

\* Corresponding author.

Tel. or fax: +86 431 85098705. E-mail address: [guoyh@nenu.edu.cn](mailto:guoyh@nenu.edu.cn) (Y. Guo)

## 1. Catalyst preparation

*Synthesis of Bi<sub>12</sub>TiO<sub>20</sub>.* Bi<sub>12</sub>TiO<sub>20</sub> was prepared via a similar solvothermal route according to our previous work [20]. Bi(NO<sub>3</sub>)<sub>3</sub>•5H<sub>2</sub>O (2.910 g) was added into ethanol (30 mL). With continuous stirring, TTIP (0.15 mL) was added to the above suspension. Subsequently, NaOH (5 mol L<sup>-1</sup>) aqueous solution was added dropwise until pH reached 13–14. After being stirred for another 2 h, the mixture was transferred into a Teflon-lined stainless steel autoclave and heated to 180 °C with a heating ramp of 2 °C min<sup>-1</sup> for 24 h, and then it was allowed to cool down naturally. The yellow-green solid product was collected and washed thoroughly with distilled water and ethanol until the acidity of the eluate is neutral. Finally, it was dried at 55 °C for 12 h.

**Table S1** Controlled experiments using different scavengers for the photocatalytic degradation of PNP mediated by Bi<sub>12</sub>TiO<sub>20</sub>/GR(2) under simulated sunlight irradiation (320 nm <  $\lambda$  < 680 nm).

| Photocatalyst                                                            | $k'_{\text{app}}$ or $k_{\text{app}}$ (h <sup>-1</sup> ) | PNP      |                                                   |
|--------------------------------------------------------------------------|----------------------------------------------------------|----------|---------------------------------------------------|
|                                                                          |                                                          | <i>R</i> | $k_{\text{app}}/k'_{\text{app}}$ (%) <sup>a</sup> |
| Bi <sub>12</sub> TiO <sub>20</sub> /GR(2)<br>(no scavenger)              | 1.037                                                    | 0.98     | 100                                               |
| Bi <sub>12</sub> TiO <sub>20</sub> /GR(2)<br>(1 mM EDTA-2Na)             | 0.051                                                    | 0.99     | 4.9                                               |
| Bi <sub>12</sub> TiO <sub>20</sub> /GR(2)<br>(1 mM BQ)                   | 0.018                                                    | 0.97     | 1.7                                               |
| Bi <sub>12</sub> TiO <sub>20</sub> /GR(2)<br>(100 mM CH <sub>3</sub> OH) | 0.401                                                    | 0.99     | 38.7                                              |
| Bi <sub>12</sub> TiO <sub>20</sub> /GR(2)<br>(1 mM <i>t</i> -BuOH)       | 1.021                                                    | 0.97     | 98.5                                              |
| Bi <sub>12</sub> TiO <sub>20</sub> /GR(2)<br>(10 mM <i>t</i> -BuOH)      | 0.896                                                    | 0.97     | 86.4                                              |

<sup>a</sup>  $k'_{\text{app}}$ : pseudo-first-order apparent rate constant determined in the absence of scavenger.

**Fig. S1** UV-vis/DRS of the mechanically mixed  $\text{Bi}_{12}\text{TiO}_{20}/\text{GR}(2)$  relative to  $\text{Bi}_{12}\text{TiO}_{20}$ .

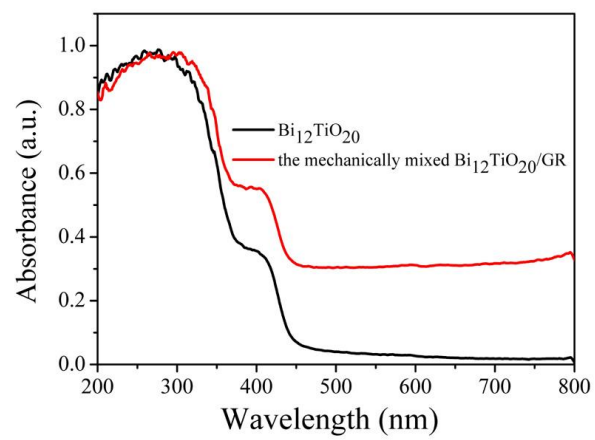

**Fig. S2** SEM image of the mechanically mixed  $\text{Bi}_{12}\text{TiO}_{20}/\text{GR}(2)$ .

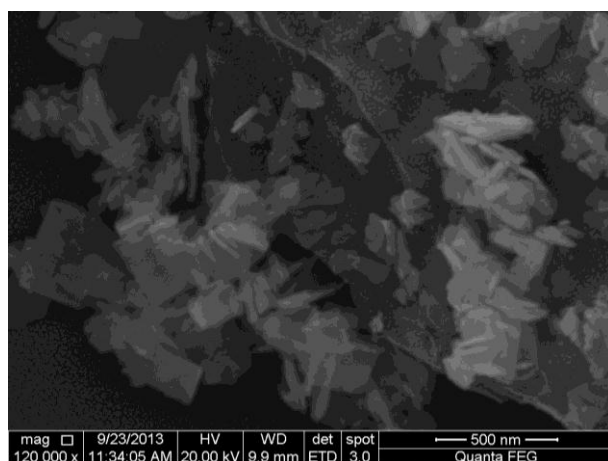

**Fig. S3** The mass spectra (a, b) and ion chromatogram (c) of compounds 1-6 detected from the PNP photodegradation process in the simulated sunlight-irradiating Bi<sub>12</sub>TiO<sub>20</sub>/GR system (320 nm <  $\lambda$  < 680 nm).

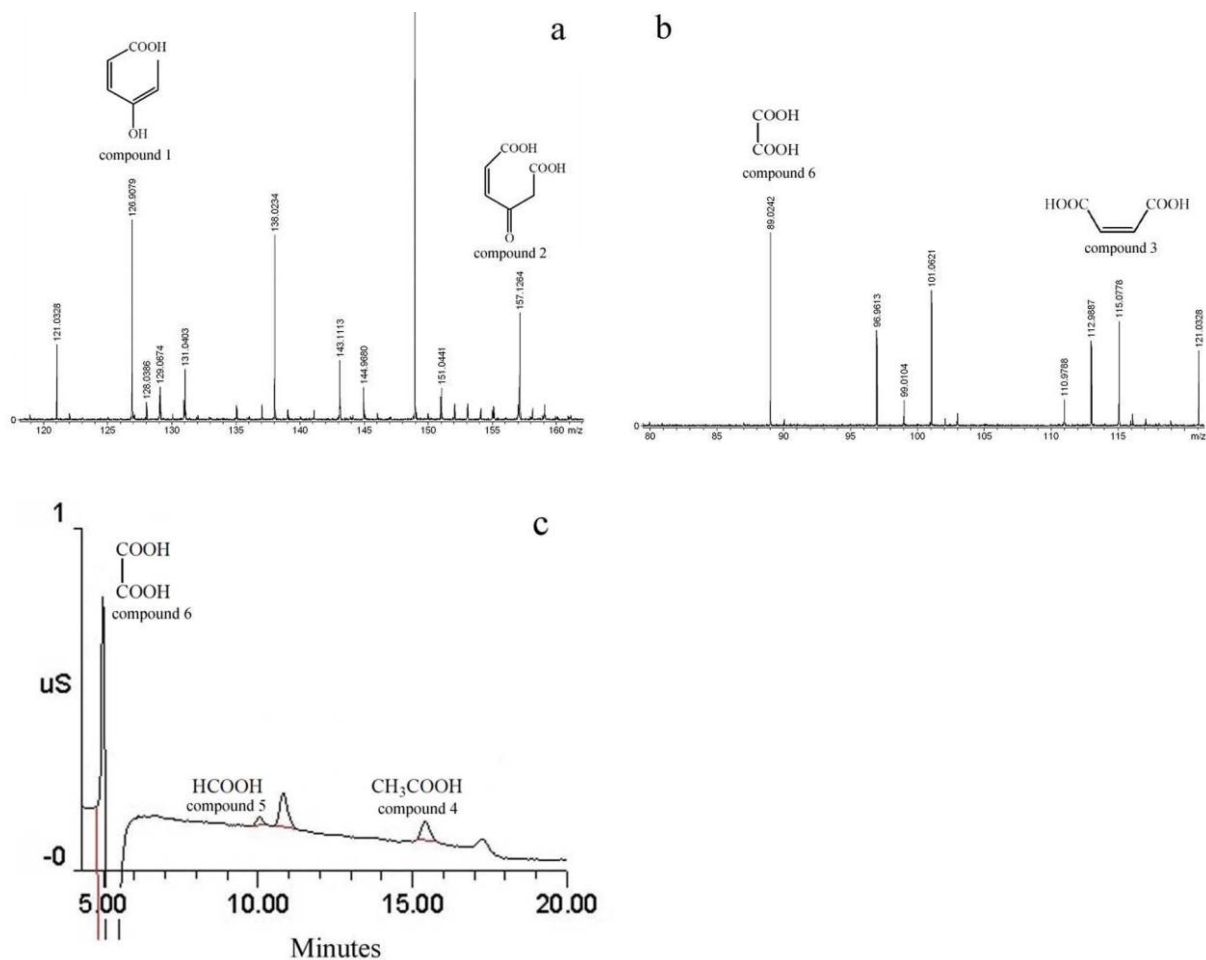

Supplement: c3cp53070a.pdf [file c3cp53070a.pdf]
